# Supplementary material
Source: PubMed Central journal article supplement (PMC2931605)
Supplement: supp_123_18_3112__3.pdf [file supp_123_18_3112__3.pdf]

**Figure S3**

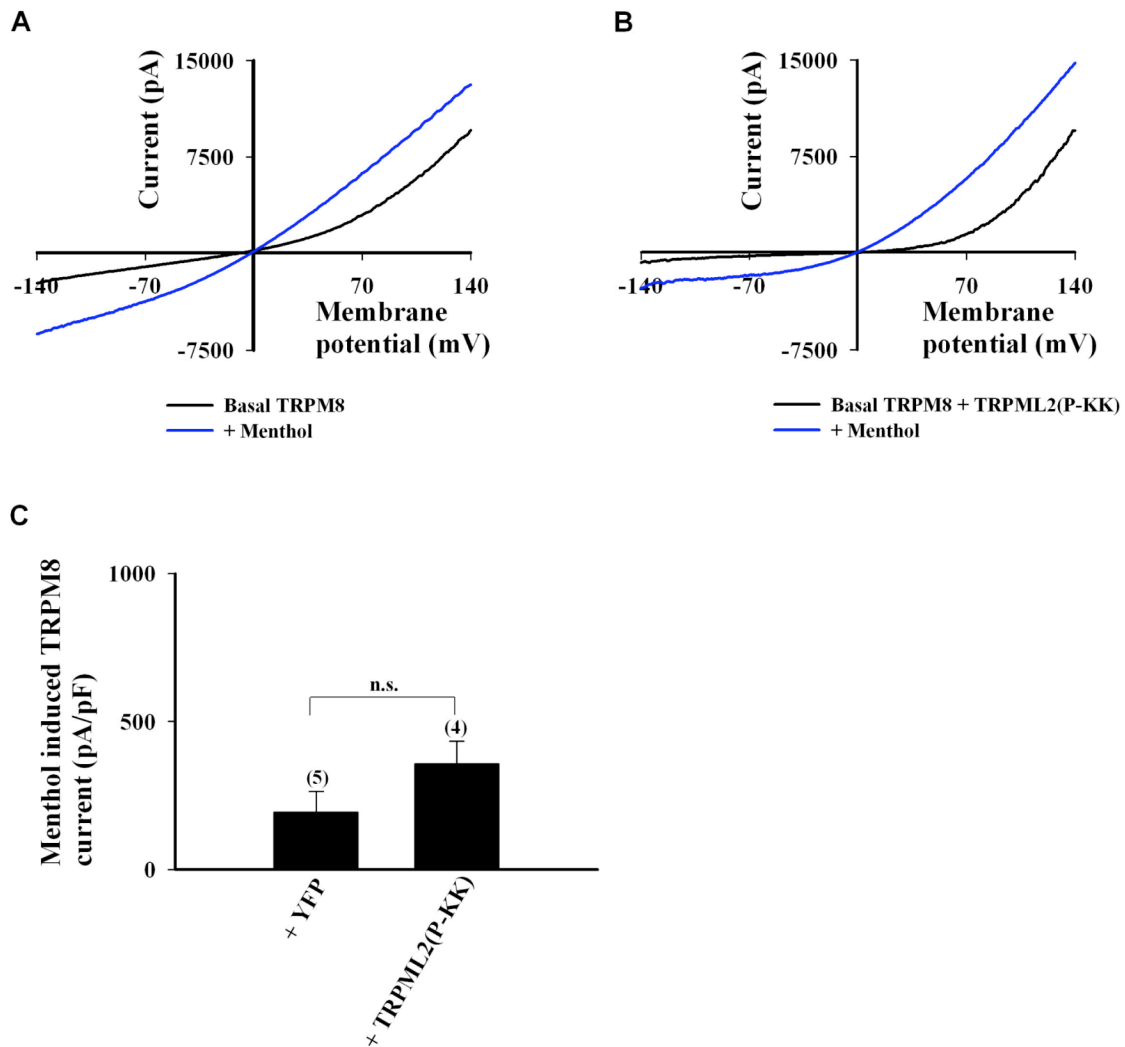

**Fig. S3.** TRPM8's menthol-induced current is not reduced when the channel is co-expressed with dominant-negative TRPML2(P-KK). **(A)** Representative I-V curves of whole-cell currents measured from HEK cells, co-transfected with TRPM8 and PMCA2. Application of menthol augments TRPM8-derived currents. **(B)** Representative I-V curves of whole-cell currents measured from HEK cells, co-transfected with TRPM8, TRPML2(P-KK), and PMCA2. **(C)** Menthol-induced current density was calculated by subtracting basal TRPM8 currents from menthol-induced TRPM8 currents. The histogram shows the average menthol-induced current density, at +80 mV, exhibited in HEK cells co-transfected with TRPM8, PMCA2, and either YFP (indicated, "+YFP") or TRPML2(P-KK)-YFP (indicated, "+TRPML2(P-KK)"). (n) = number of cells analyzed. n.s., p-value not significant.
